# Supplementary material for: A novel recessive mutation affecting DNAJB6a causes myofibrillar myopathy
Source: PubMed Central journal article supplement (PMC7869515; doi:10.1186/s40478-020-01046-w), 2021-02-08
Supplement: 40478_2020_1046_MOESM1_ESM.pdf [file 40478_2020_1046_MOESM1_ESM.pdf]

distal lower leg

proximal lower leg

Heterozygous mutation

II 1

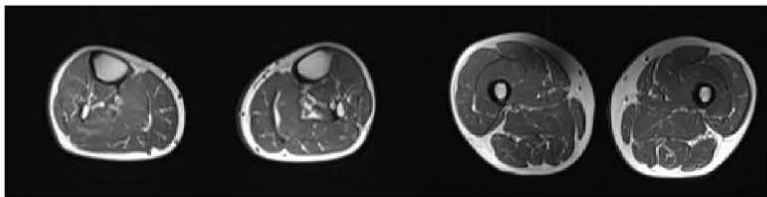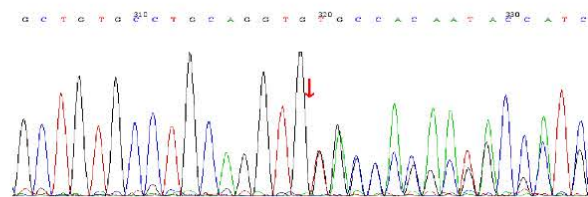

II 7

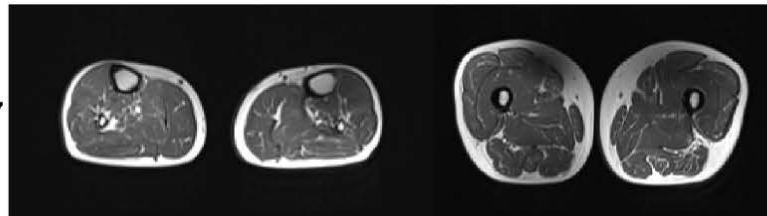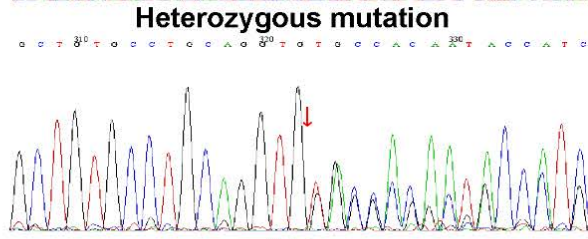

III 1

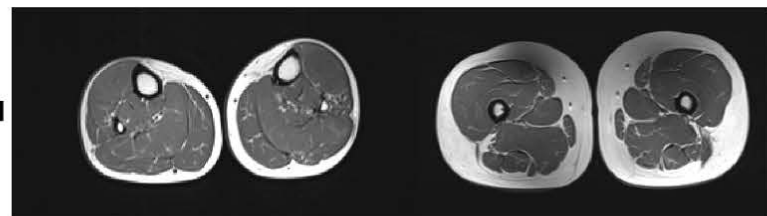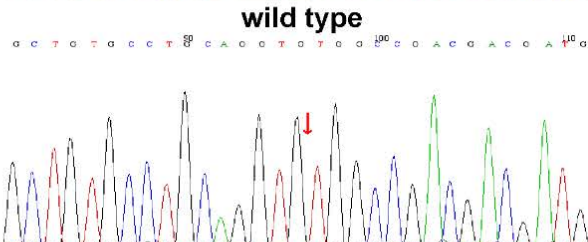

III 3

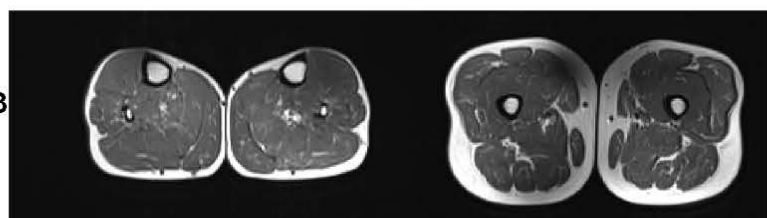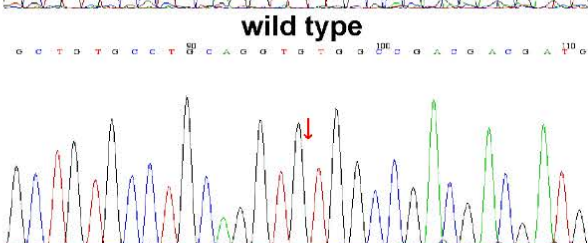

III 4

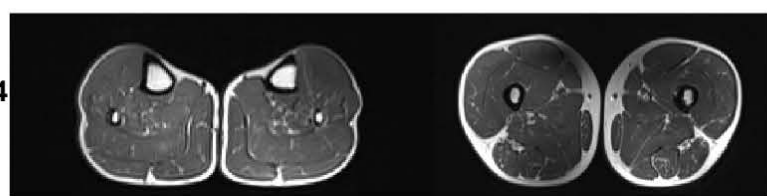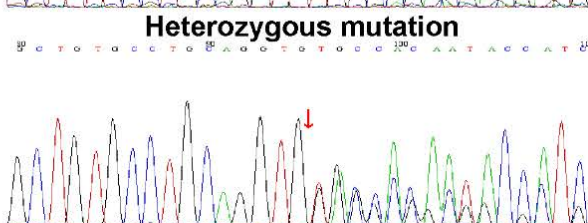

III 5

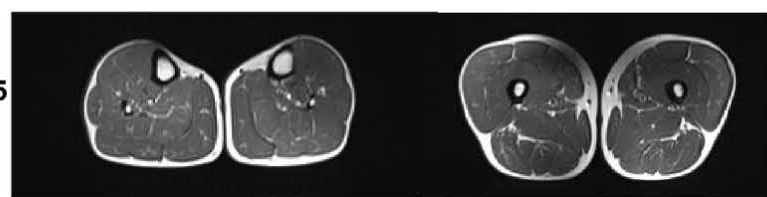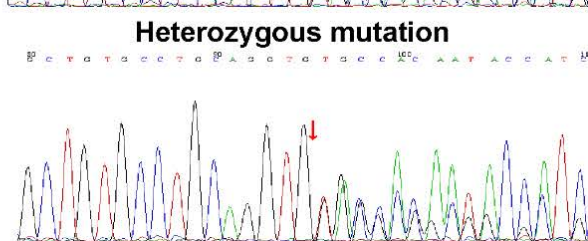

III 6

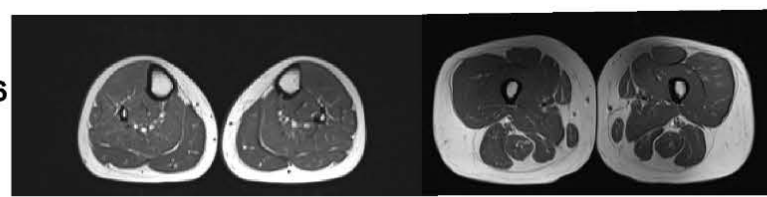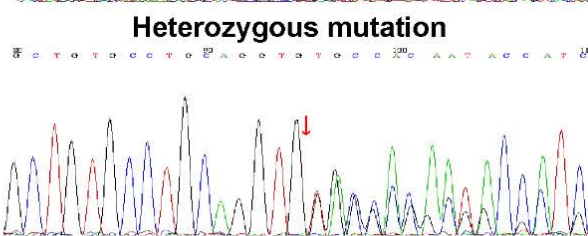

III 7

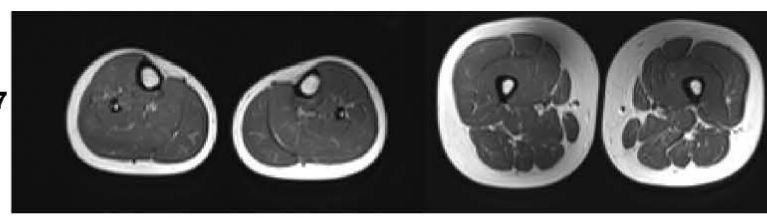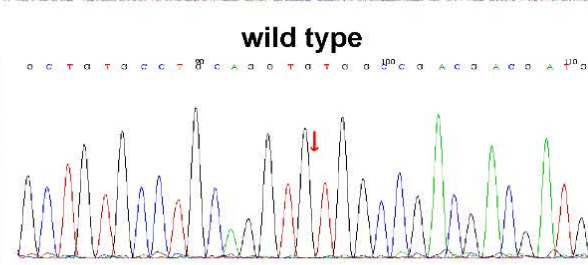

**Figure S1** Muscle MRI imaging and representative chromatogram of forward sequencing reaction of the proband's family members. No apparent signs of abnormality in the muscle of proximal and distal lower limbs.

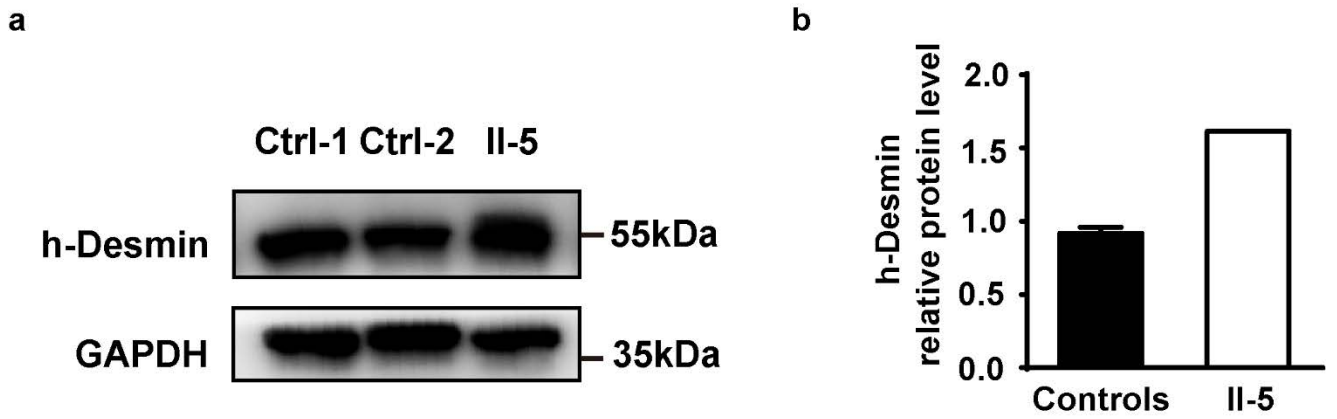

**Figure S2** Western blot analysis of desmin protein in the patient with the *DNAJB6* mutation. **a** Representative Western blot analysis of muscle (30  $\mu$ g) homogenates from controls and patient II-5, using desmin and GAPDH antibodies. **b** Quantification of relative intensities of proteins shown in **a**. P value= $* < 0.05$ ,  $** < 0.01$ .

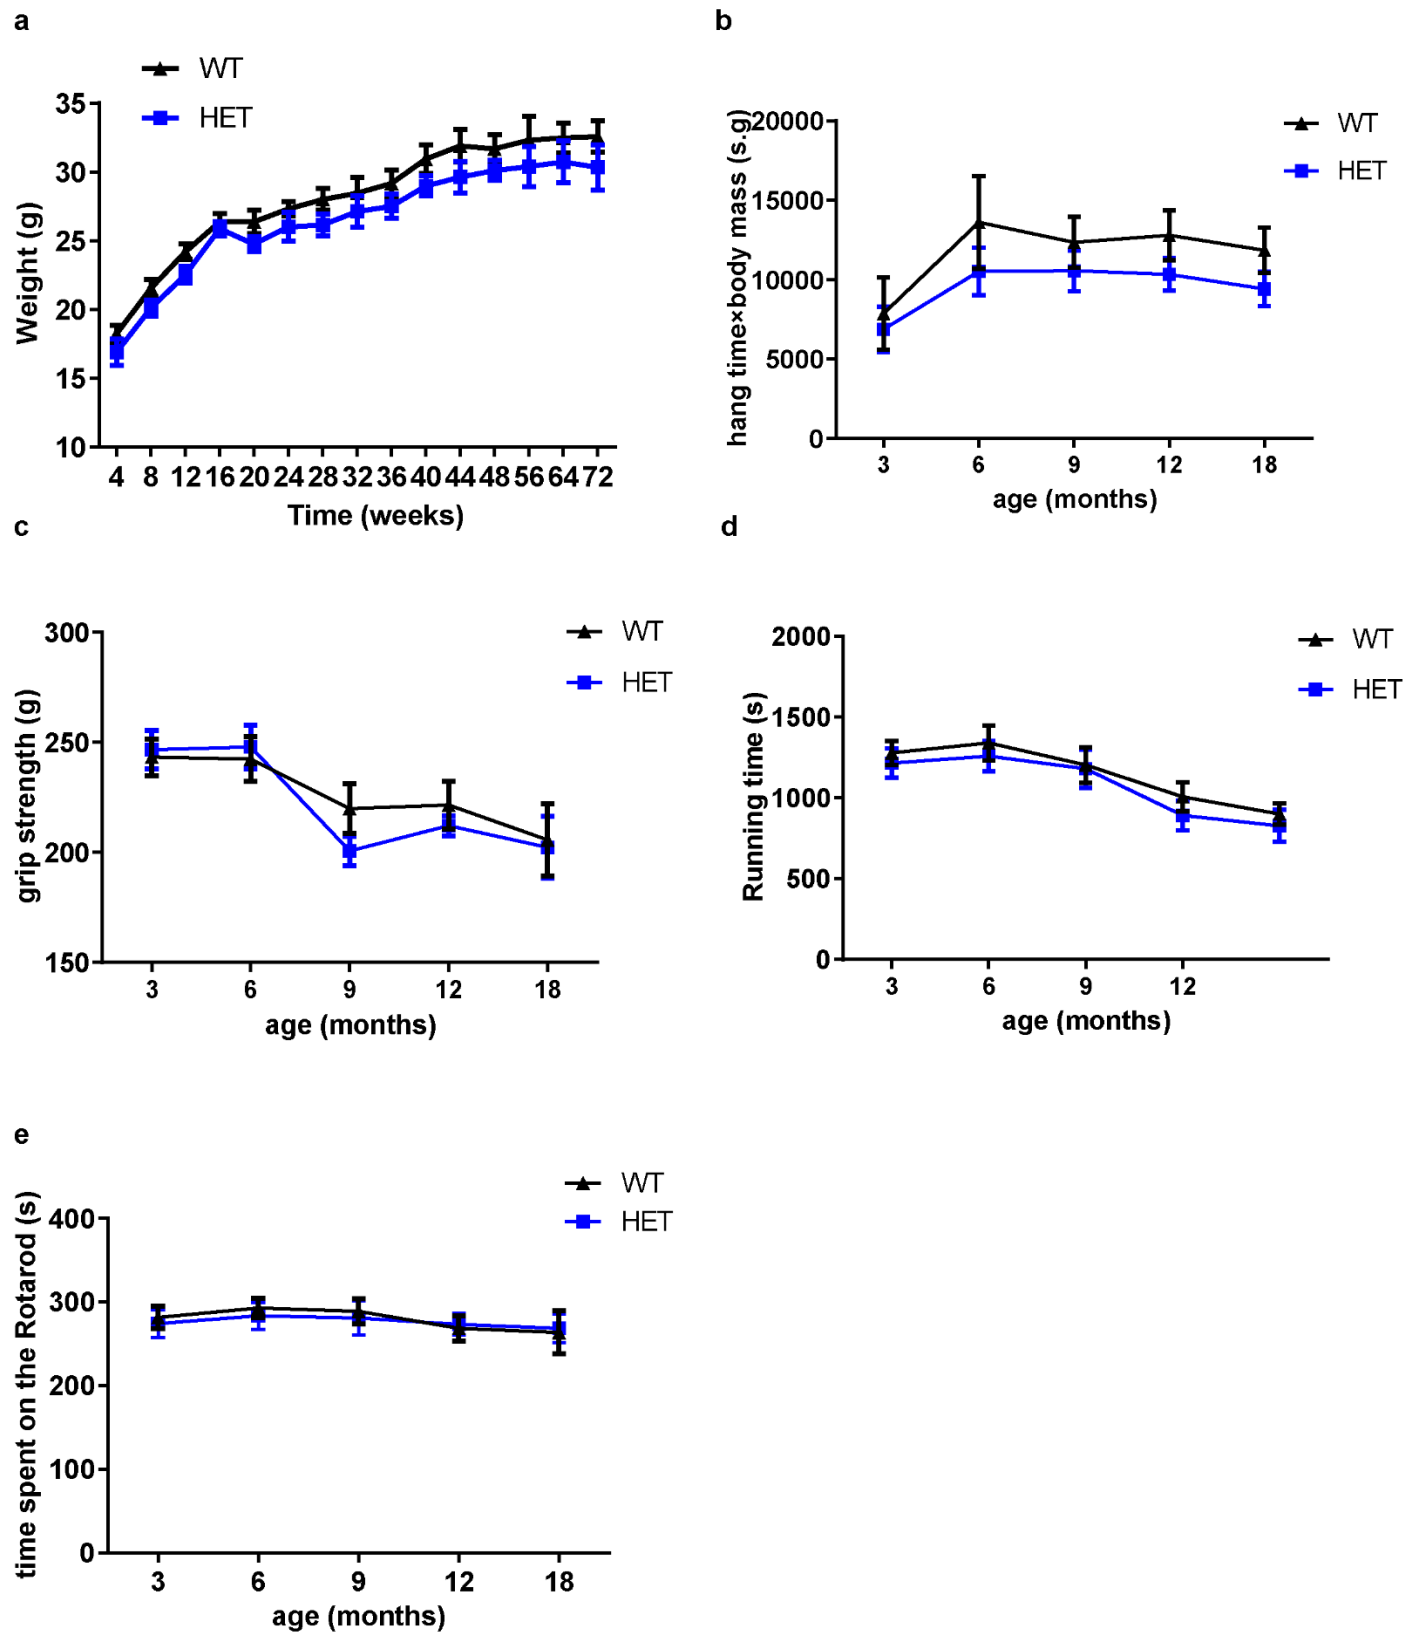

**Figure S3** Assessment of motor function in the HET and WT mice. **a** Body weight curves showing changes in body weight over 18 months for HET and WT mice. Shown are mean  $\pm$  SEM (n = 12-15) **b** Hanging test showing “minimal holding impulse” (body mass x hang time), in seconds (s) x gram (g), in 3, 6, 9, 12, 18-month old HET mice and WT littermates. **c** Mean score in grip strength over time in HET mice and WT littermates. **d** Treadmill experiments shown by duration of running, in seconds (s), before showing signs of exhaustion in HET mice and WT littermates. **e** Rotarod performance showing mean duration, in seconds (s), spent on the accelerating rotating rod at 3, 6, 9, 12, 18-month old HET and WT mice. Values represent means  $\pm$  SEM (n = 12-15). P value = \* < 0.05, \*\* < 0.01.

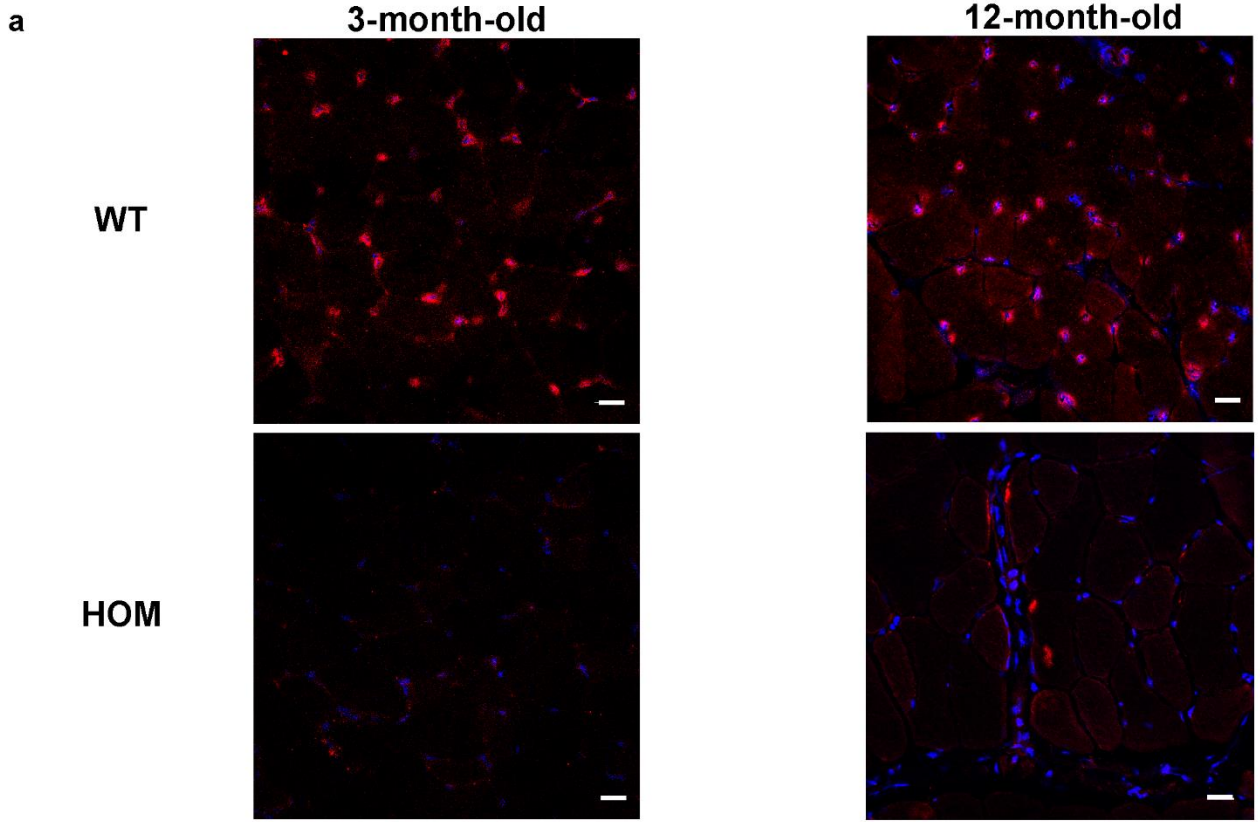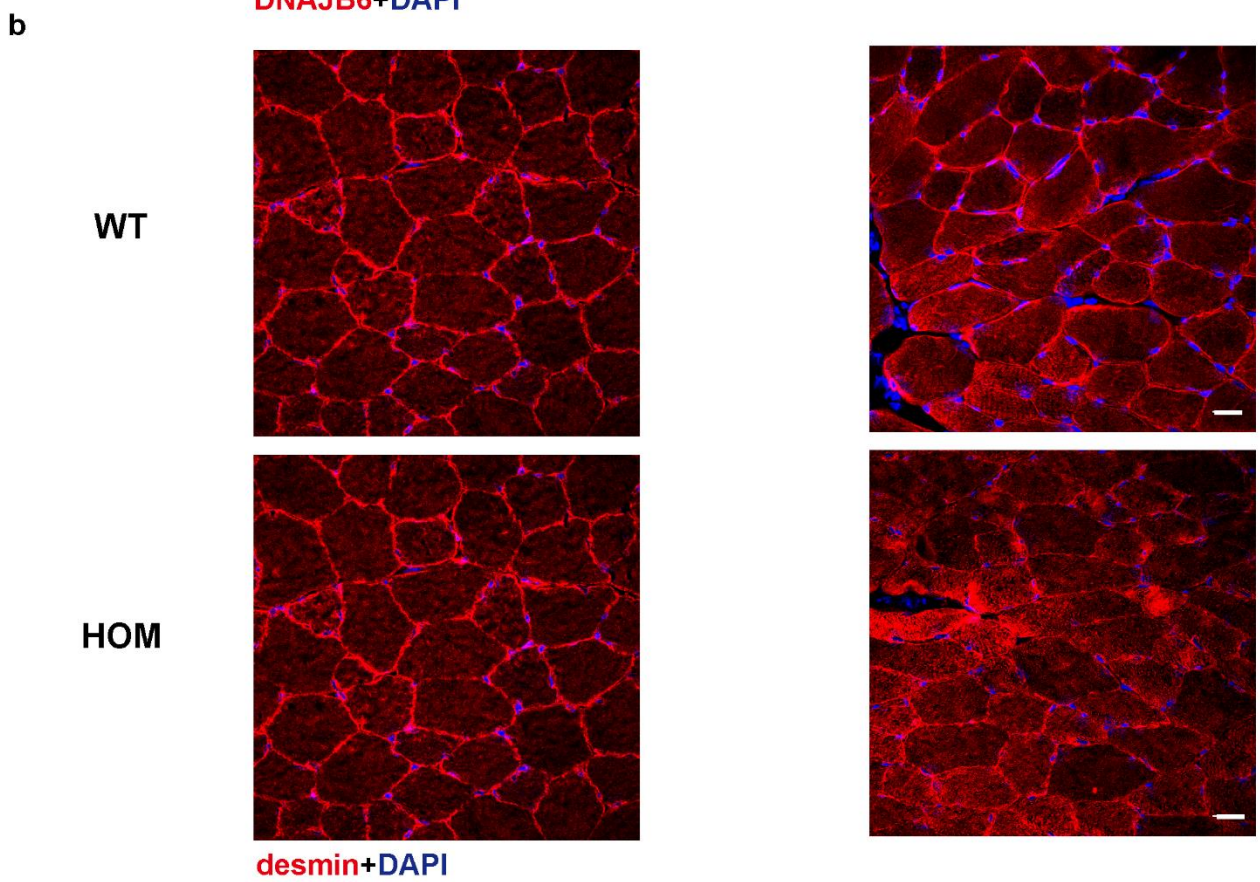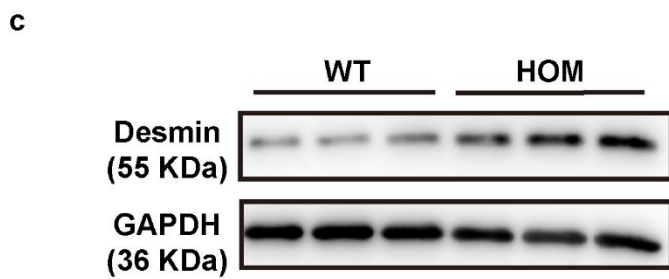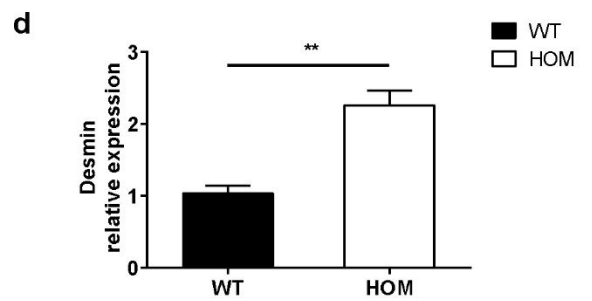

**Figure S4** Subcellular distribution of DNAJB6 and desmin in skeletal muscle tissue of 3 and 12-month-old HOM and WT mice. **a** DNAJB6 staining displayed diminished nuclear staining of muscle fibers in HOM mice compared with WT mice, while no accumulation in the sarcoplasm in the 3-month-old mice. 12-month-old HOM mice displayed sarcoplasmic and subsarcolemmal aggregates in some muscle fibers. Scale bar = 20  $\mu$ m. **b** Desmin was uniformly stained in the sarcoplasm of muscle fibers in HOM mice when 3 months old, while displayed sarcoplasmic and subsarcolemmal aggregates when 12 months old. Scale bar = 20  $\mu$ m. **c** Western blot analysis of gastrocnemius muscle (30  $\mu$ g) homogenates from 12-month-old WT and HOM mice, using desmin and GAPDH antibodies. **d** Quantification of relative intensities of proteins shown in **c**. Data are shown as means  $\pm$  SEM of 3 independent experiments (n = 3). P value=\* $<0.05$ , \*\* $<0.01$ .

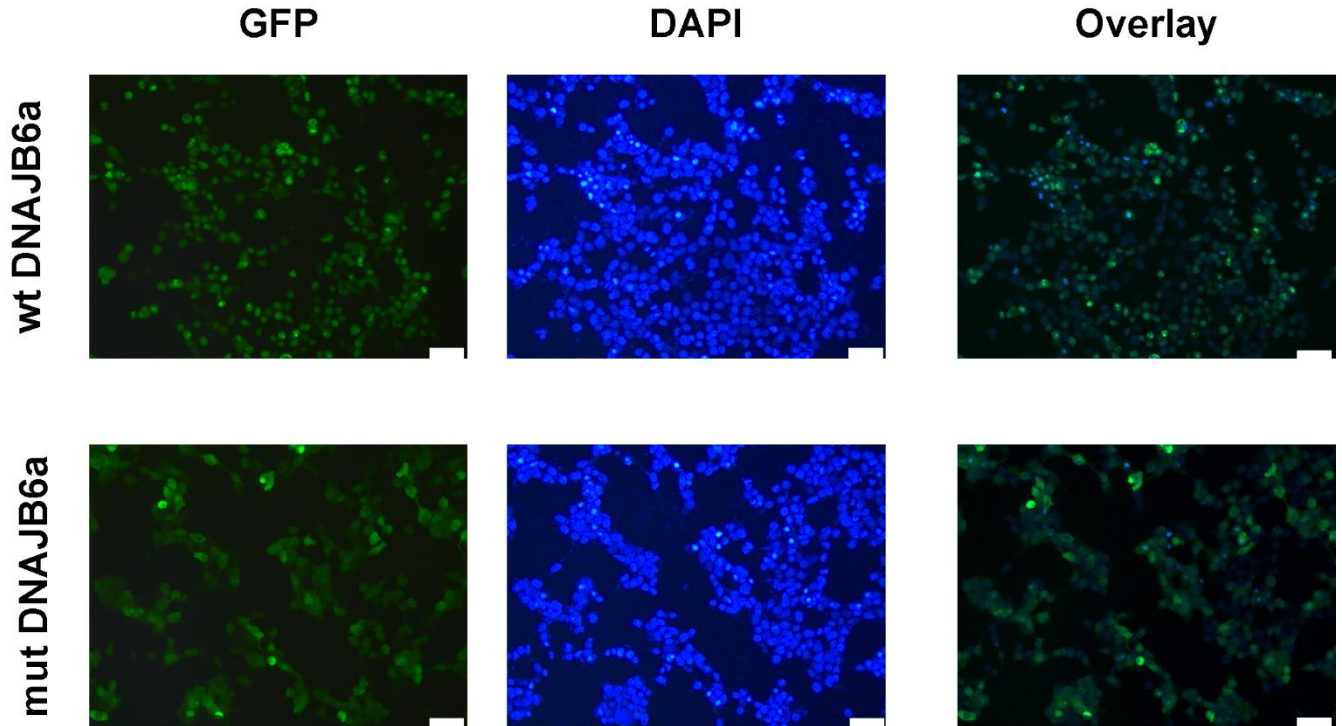

**Figure S5** The distribution of wild type DNAJB6a and mutant DNAJB6a in HEK293 cells. **a** Representative immunofluorescent images of HEK293 cells transfected with 500ng wild type GFP-fused DNAJB6a (wt DNAJB6a) plasmids for 48h. Scale bar = 50  $\mu$ m. **b** Representative immunofluorescent images of HEK293 cells transfected with 1500ng mutant GFP-fused DNAJB6a (mut DNAJB6a) plasmids for 48h. Scale bar = 50  $\mu$ m.
